# Supplementary material for: Community Pharmacists’ Knowledge, Attitude, and Practice in Providing Self-Care Recommendations for the Management of Premenstrual Syndrome
Source: MDPI journal article supplement (doi:10.3390/medicina56040181), 2020-04-15
Supplement: s1 [file s1]

**Community Pharmacists' Knowledge, Attitude, and  
Practice in Providing Self-Care Recommendations for  
the Management of Premenstrual Syndrome**

## Section A: DEMOGRAPHIC INFORMATION

1. **Gender** : ☐ Male ☐ Female
2. **Age** : \_\_\_\_\_ years
3. **Race** : ☐ Malay ☐ Chinese ☐ Indian ☐ Others: \_\_\_\_\_
4. **Graduated from**  
(For Bachelor of Pharmacy) ☐ Local university/college ☐ Overseas university/college
5. **Highest academic qualifications** : ☐ Degree ☐ Master ☐ PhD ☐ Others: \_\_\_\_\_
6. **Years as a registered pharmacist** : \_\_\_\_\_ years
7. **Years as a community pharmacist** : \_\_\_\_\_ years
8. **Location of community pharmacy** :  ☐ Titiwangsa ☐ Wangsa Maju ☐ Batu  
☐ Setiawangsa ☐ Lembah Pantai ☐ Cheras  
☐ Seputeh ☐ Bukit Bintang ☐ Kepong  
☐ Bandar Tun Razak ☐ Segambut
9. **Position as community** : ☐ Full time pharmacist ☐ Part-time/locum pharmacist
10. **Did you take courses in pharmacy school regarding minor illnesses in women**  
i.e. Pre-menstrual syndrome ☐ Yes ☐ No

|     |                                                                          |   |                          |                     |                          |                                    |
|-----|--------------------------------------------------------------------------|---|--------------------------|---------------------|--------------------------|------------------------------------|
| 11. | Where did you learn the most about managing Pre-menstrual syndrome (PMS) | : | <input type="checkbox"/> | Pharmacy School     | <input type="checkbox"/> | Continuing Education               |
|     |                                                                          |   | <input type="checkbox"/> | Practice Experience | <input type="checkbox"/> | Others<br>Please specify:<br>_____ |

## Section B: KNOWLEDGE OF PRE-MENSTRUAL SYNDROME AND ITS MANAGEMENT

Based on your **knowledge**, please **TICK** the appropriate answer from question 1 to 5.

- |     |                                                                                                                                                          |                          |      |                          |       |                          |              |
|-----|----------------------------------------------------------------------------------------------------------------------------------------------------------|--------------------------|------|--------------------------|-------|--------------------------|--------------|
| 1A. | PMS is preceded by the appearance of the secondary sex characteristics and body changes that occur sometime between the ages of 9 and 16.                | <input type="checkbox"/> | True | <input type="checkbox"/> | False | <input type="checkbox"/> | I don't know |
| 1B. | PMS can be defined as a recurrent disorder that occurs every month in the luteal phase of the menstrual cycle and remits with the onset of menstruation. | <input type="checkbox"/> | True | <input type="checkbox"/> | False | <input type="checkbox"/> | I don't know |
| 1C. | PMS is that point in time when permanent cessation of menstruation occurs following the loss of ovarian activity.                                        | <input type="checkbox"/> | True | <input type="checkbox"/> | False | <input type="checkbox"/> | I don't know |
| 2A. | Affective symptoms of PMS are <b>depression, anger, irritability, anxiety, confusion and social withdrawal.</b>                                          | <input type="checkbox"/> | True | <input type="checkbox"/> | False | <input type="checkbox"/> | I don't know |
| 2B. | Somatic symptoms of PMS are <b>breast pain, abdominal bloating, headache and swelling of extremities.</b>                                                | <input type="checkbox"/> | True | <input type="checkbox"/> | False | <input type="checkbox"/> | I don't know |
| 3A. | PMS can increase quality of life.                                                                                                                        | <input type="checkbox"/> | True | <input type="checkbox"/> | False | <input type="checkbox"/> | I don't know |
| 3B. | PMS can decrease work productivity.                                                                                                                      | <input type="checkbox"/> | True | <input type="checkbox"/> | False | <input type="checkbox"/> | I don't know |
| 3C. | PMS can interfere with sleep quality.                                                                                                                    | <input type="checkbox"/> | True | <input type="checkbox"/> | False | <input type="checkbox"/> | I don't know |
| 4A. | Sertraline can relieve PMS symptoms.                                                                                                                     | <input type="checkbox"/> | True | <input type="checkbox"/> | False | <input type="checkbox"/> | I don't know |
| 4B. | Ibuprofen can relieve PMS symptoms.                                                                                                                      | <input type="checkbox"/> | True | <input type="checkbox"/> | False | <input type="checkbox"/> | I don't know |
| 4C. | Spironolactone can relieve PMS symptoms.                                                                                                                 | <input type="checkbox"/> | True | <input type="checkbox"/> | False | <input type="checkbox"/> | I don't know |
| 5A. | Increased intake of caffeine can alleviate PMS symptom.                                                                                                  | <input type="checkbox"/> | True | <input type="checkbox"/> | False | <input type="checkbox"/> | I don't know |

5B. Increased fibre and carbohydrates intake can alleviate PMS symptoms. ☐ Yes ☐ No ☐ I don't know

5C. Exercise regularly can alleviate PMS symptoms. ☐ Yes ☐ No ☐ I don't know

## Section C: ATTITUDES OF COMMUNITY PHARMACISTS TOWARDS PMS MANAGEMENT

Use the scale below to indicate how much you **AGREE** or **DISAGREE** with each of the following statements. **Circle** your answer in the space provided.

|                                                                                        |                   |                                                                                        |                |                                                                                        |         |
|----------------------------------------------------------------------------------------|-------------------|----------------------------------------------------------------------------------------|----------------|----------------------------------------------------------------------------------------|---------|
| <div style="border: 1px solid black; padding: 2px 5px; display: inline-block;">1</div> | Strongly Disagree | <div style="border: 1px solid black; padding: 2px 5px; display: inline-block;">2</div> | Disagree       | <div style="border: 1px solid black; padding: 2px 5px; display: inline-block;">3</div> | Neutral |
| <div style="border: 1px solid black; padding: 2px 5px; display: inline-block;">4</div> | Agree             | <div style="border: 1px solid black; padding: 2px 5px; display: inline-block;">5</div> | Strongly Agree |                                                                                        |         |

|     |                                                                                                                             |   |   |   |   |   |
|-----|-----------------------------------------------------------------------------------------------------------------------------|---|---|---|---|---|
| 1.  | Pharmacists should know which medicine is used to relieve PMS.                                                              | 1 | 2 | 3 | 4 | 5 |
| 2.  | Pharmacist should know the non-medical way to ease PMS.                                                                     | 1 | 2 | 3 | 4 | 5 |
| 3.  | Pharmacist should have sufficient time to provide self-care recommendation to patients with PMS.                            | 1 | 2 | 3 | 4 | 5 |
| 4.  | Pharmacist should actively involve in selection of self-care medication for the patients with PMS.                          | 1 | 2 | 3 | 4 | 5 |
| 5.  | Pharmacist should provide patients with information regarding the medicine use for PMS.                                     | 1 | 2 | 3 | 4 | 5 |
| 6.  | Pharmacists should recommend a PMS-relieving product based on its scientific evidence.                                      | 1 | 2 | 3 | 4 | 5 |
| 7.  | Pharmacists need to explain the doses and ways of taking medicines to ease the PMS.                                         | 1 | 2 | 3 | 4 | 5 |
| 8.  | Pharmacists should inform patient of the side effect of the PMS relieving product.                                          | 1 | 2 | 3 | 4 | 5 |
| 9.  | Pharmacists should always check that their patient understand the information they are provide about PMS-relieving product. | 1 | 2 | 3 | 4 | 5 |
| 10. | Pharmacists need to be ready to respond to inquiries from customers about PMS-relieving product.                            | 1 | 2 | 3 | 4 | 5 |
| 11. | Patients regularly accept my recommendations for PMS-relieving products.                                                    | 1 | 2 | 3 | 4 | 5 |
| 12. | I am willing to provide recommendations for managing PMS when given the opportunity.                                        | 1 | 2 | 3 | 4 | 5 |

## Section D: PRACTICE AND PATTERN OF PHARMACOLOGICAL RECOMMENDATION

Please **TICK** in the space provided to indicate your answer for each of the following questions 1 and 2.

1. Have you ever received a customer with PMS? ☐ Yes ☐ No

(If your answer is '**YES**', go to Question 2. If your answer is '**NO**', go to Question 4)

2. If '**YES**', how often does this happen? ☐ Daily ☐ Weekly  
☐ Monthly ☐ Yearly

Please rate your level of agreement for the following statements by ticking in the appropriate box from **question 3 until 5**.

3. Which of the following PMS **symptoms** is/are **often mentioned by customers** coming to your pharmacy?

|   |       |   |        |   |                |
|---|-------|---|--------|---|----------------|
| 1 | Never | 2 | Rarely | 3 | Sometime       |
| 4 | Often | 5 | Always | 6 | Not Applicable |

|                         | 1 | 2 | 3 | 4 | 5 | 6 |
|-------------------------|---|---|---|---|---|---|
| Breast Pain             |   |   |   |   |   |   |
| Anger                   |   |   |   |   |   |   |
| Abdominal Bloating      |   |   |   |   |   |   |
| Irritability            |   |   |   |   |   |   |
| Headache                |   |   |   |   |   |   |
| Anxiety                 |   |   |   |   |   |   |
| Swelling of Extremities |   |   |   |   |   |   |
| Confusion               |   |   |   |   |   |   |
| Depression              |   |   |   |   |   |   |
| Social withdrawal       |   |   |   |   |   |   |

4. For each of the products listed below, how often have you **recommended** them to your customers with PMS?

|   |       |   |        |   |               |
|---|-------|---|--------|---|---------------|
| 1 | Never | 2 | Rarely | 3 | Sometime      |
| 4 | Often | 5 | Always | 6 | Not Available |

|                      | 1 | 2 | 3 | 4 | 5 | 6 |
|----------------------|---|---|---|---|---|---|
| Calcium              |   |   |   |   |   |   |
| Magnesium            |   |   |   |   |   |   |
| Chasteberry          |   |   |   |   |   |   |
| Vitamin B6           |   |   |   |   |   |   |
| Vitamin E            |   |   |   |   |   |   |
| Saffron              |   |   |   |   |   |   |
| St. John's Wort      |   |   |   |   |   |   |
| Soy                  |   |   |   |   |   |   |
| Evening Primrose Oil |   |   |   |   |   |   |
| Ibuprofen            |   |   |   |   |   |   |
| Mefenamic Acid       |   |   |   |   |   |   |
| Naproxen             |   |   |   |   |   |   |

5. For each product listed below, how often this product was **asked** by your customers?

|                      | 1 | 2 | 3 | 4 | 5 | 6 |
|----------------------|---|---|---|---|---|---|
| Calcium              |   |   |   |   |   |   |
| Magnesium            |   |   |   |   |   |   |
| Chasteberry          |   |   |   |   |   |   |
| Vitamin B6           |   |   |   |   |   |   |
| Vitamin E            |   |   |   |   |   |   |
| Saffron              |   |   |   |   |   |   |
| St. John's Wort      |   |   |   |   |   |   |
| Soy                  |   |   |   |   |   |   |
| Evening Primrose Oil |   |   |   |   |   |   |
| Ibuprofen            |   |   |   |   |   |   |
| Mefenamic Acid       |   |   |   |   |   |   |
| Naproxen             |   |   |   |   |   |   |

6. If there is any suggested product by you to your PMS customer(s), other than the above listed products, you may share it below:

.....



### Section E: PRACTICE OF NON-PHARMACOLOGICAL AND SELF-MEDICATIONS MEASURE

Please **TICK** the appropriate answers for the questions 1 to 7. You may choose **MORE THAN ONE ANSWERS**.

1. Which of the following represent(s) your advice to your customer(s) for the management of PMS?

|                          |                             |                          |                                            |
|--------------------------|-----------------------------|--------------------------|--------------------------------------------|
| <input type="checkbox"/> | No advice                   | <input type="checkbox"/> | Avoid caffeine and alcohol                 |
| <input type="checkbox"/> | Avoid stressful situation   | <input type="checkbox"/> | Use antipyretic if fever present           |
| <input type="checkbox"/> | Doing more exercise         | <input type="checkbox"/> | Talk to your friend or colleagues          |
| <input type="checkbox"/> | Eating healthy balance diet | <input type="checkbox"/> | Consult the doctor if the symptoms persist |
| <input type="checkbox"/> | Rest and sleep more         | <input type="checkbox"/> | Others: Please specify: _____              |

2. What was (were) the reason(s) that you encourage your customers with PMS to practice self-medication?

|                          |                                      |                          |                                      |
|--------------------------|--------------------------------------|--------------------------|--------------------------------------|
| <input type="checkbox"/> | Illness too trivial for consultation | <input type="checkbox"/> | Ease of availability and convenience |
| <input type="checkbox"/> | Privacy                              | <input type="checkbox"/> | Cost saving                          |
| <input type="checkbox"/> | Avoid crowd at OPD                   | <input type="checkbox"/> | Lack of trust in prescribing doctor  |
| <input type="checkbox"/> | To save time                         | <input type="checkbox"/> | Others: Please specify: _____        |

3. What the reason(s) do you against your customer(s) with PMS to practice self-medication?

|                          |                                   |                          |                                 |
|--------------------------|-----------------------------------|--------------------------|---------------------------------|
| <input type="checkbox"/> | Risk of drug abuse and dependence | <input type="checkbox"/> | Risk of using wrong medications |
| <input type="checkbox"/> | Risk of drug interactions         | <input type="checkbox"/> | Risk of adverse effects         |
| <input type="checkbox"/> | Risk of disease misdiagnosis      | <input type="checkbox"/> | Others: _____                   |
| <input type="checkbox"/> | Consult a doctor                  | <input type="checkbox"/> | Please specify: _____           |

4. What do you think about self-medication for PMS management?

|                          |               |                          |                     |                          |                         |
|--------------------------|---------------|--------------------------|---------------------|--------------------------|-------------------------|
| <input type="checkbox"/> | Good practice | <input type="checkbox"/> | Acceptable practice | <input type="checkbox"/> | Not acceptable practice |
|--------------------------|---------------|--------------------------|---------------------|--------------------------|-------------------------|
